# Supplementary material for: Here’s something I prepared earlier: a review of the time to publication of cross-sectional reviews of smartphone health apps
Source: HighWire-hosted journal article supplement (doi:10.1136/bmjopen-2020-039817), 2020-12-01
Supplement: bmjopen-2020-039817supp001_data_supplement.pdf [file bmjopen-2020-039817supp001_data_supplement.pdf]

## S1 Alternative pilot search strategy

The final search strategy is reported in Box 1 of the manuscript.

1. Mobile Applications/
2. Cell Phone/
3. 1 or 2
4. exp "Review"/ or exp "Systematic Review"/ or review.mp.
5. assessment.mp. [mp=title, abstract, original title, name of substance word, subject heading word, floating sub-heading word, keyword heading word, organism supplementary concept word, protocol supplementary concept word, rare disease supplementary concept word, unique identifier, synonyms]
6. 4 or 5
7. 3 and 6
8. Humans/
9. 7 and 8
10. limit 9 to yr="2007 -Current"
11. limit 10 to yr="2018"
