# Supplementary material for: Here’s something I prepared earlier: a review of the time to publication of cross-sectional reviews of smartphone health apps
Source: HighWire-hosted journal article supplement (doi:10.1136/bmjopen-2020-039817), 2020-12-01
Supplement: bmjopen-2020-039817supp002_data_supplement.pdf [file bmjopen-2020-039817supp002_data_supplement.pdf]

## S2 List of included studies

| Authors                                                                                                           | Title                                                                                                                                                                         | Journal                                                                 |
|-------------------------------------------------------------------------------------------------------------------|-------------------------------------------------------------------------------------------------------------------------------------------------------------------------------|-------------------------------------------------------------------------|
| O'Loughlin K., Neary M., Adkins E.C., Schueller S.M.                                                              | Reviewing the data security and privacy policies of mobile apps for depression.                                                                                               | Internet Interventions                                                  |
| Quevedo Rodriguez A., Wagner A.M.                                                                                 | Mobile phone applications for diabetes management: A systematic review.                                                                                                       | Endocrinologia, Diabetes y Nutricion                                    |
| Mousavi Jazayeri S.M.H., Jamshidnezhad A.                                                                         | Top mobile applications in pediatrics and children's health: Assessment and intelligent analysis tools for a systematic investigation.                                        | Malaysian Journal of Medical Sciences                                   |
| Middelweerd, Anouk, Mollee, Julia S, van der Wal, C. Natalie, Brug, Johannes, te Velde, Saskia J                  | Apps to promote physical activity among adults: A review and content analysis.                                                                                                | The International Journal of Behavioral Nutrition and Physical Activity |
| Singer, Mathias Van, Chatton, Anne, Khazaal, Yasser                                                               | Quality of smartphone apps related to panic disorder.                                                                                                                         | Frontiers in Psychiatry                                                 |
| Bennett, Melanie E, Toffey, Kristin, Dickerson, Faith, Himelhoch, Seth, Katsafanas, Emily, Savage, Christina L. G | A review of android apps for smoking cessation.                                                                                                                               | Journal of Smoking Cessation                                            |
| Bardus, Marco, van Beurden, Samantha B, Smith, Jane R, Abraham, Charles                                           | A review and content analysis of engagement, functionality, aesthetics, information quality, and change techniques in the most popular commercial apps for weight management. | The International Journal of Behavioral Nutrition and Physical Activity |
| Jeon E, Park HA, Min YH, Kim HY                                                                                   | Analysis of the information quality of korean obesity-management smartphone applications.                                                                                     | Healthcare Informatics Research                                         |
| Mendiola MF, Kalnicki M, Lindenauer S                                                                             | Valuable features in mobile health apps for patients and consumers: content analysis of apps and user ratings.                                                                | JMIR MHealth and UHealth                                                |
| Payne HE, Moxley VB, MacDonald E                                                                                  | Health Behavior Theory in Physical Activity Game Apps: A Content Analysis.                                                                                                    | JMIR Serious Games                                                      |
| Ramo DE, Popova L, Grana R, Zhao S, Chavez K                                                                      | Cannabis Mobile Apps: A Content Analysis.                                                                                                                                     | JMIR MHealth and UHealth                                                |
| Mani M, Kavanagh DJ, Hides L, Stoyanov SR                                                                         | Review and Evaluation of Mindfulness-Based iPhone Apps.                                                                                                                       | JMIR MHealth and UHealth                                                |

| <b>Authors</b>                                                                                                      | <b>Title</b>                                                                                                                                                                  | <b>Journal</b>                          |
|---------------------------------------------------------------------------------------------------------------------|-------------------------------------------------------------------------------------------------------------------------------------------------------------------------------|-----------------------------------------|
| Hale K, Capra S, Bauer J                                                                                            | A Framework to Assist Health Professionals in Recommending High-Quality Apps for Supporting Chronic Disease Self-Management: Illustrative Assessment of Type 2 Diabetes Apps. | JMIR MHealth and UHealth                |
| Taki S, Campbell KJ, Russell CG, Elliott R, Laws R, Denney-Wilson E                                                 | Infant Feeding Websites and Apps: A Systematic Assessment of Quality and Content.                                                                                             | Interactive Journal of Medical Research |
| Chen J, Cade JE, Allman-Farinelli M                                                                                 | The Most Popular Smartphone Apps for Weight Loss: A Quality Assessment.                                                                                                       | JMIR MHealth and UHealth                |
| Mangone ER, Lebrun V, Muessig KE                                                                                    | Mobile Phone Apps for the Prevention of Unintended Pregnancy: A Systematic Review and Content Analysis.                                                                       | JMIR MHealth and UHealth                |
| Con D, De Cruz P                                                                                                    | Mobile Phone Apps for Inflammatory Bowel Disease Self-Management: A Systematic Assessment of Content and Tools.                                                               | JMIR MHealth and UHealth                |
| Iribarren SJ, Schnall R, Stone PW, Carballo-Diequez A                                                               | Smartphone Applications to Support Tuberculosis Prevention and Treatment: Review and Evaluation.                                                                              | JMIR MHealth and UHealth                |
| Masterson Creber RM, Maurer MS, Reading M, Hiraldo G, Hickey KT, Iribarren S                                        | Review and Analysis of Existing Mobile Phone Apps to Support Heart Failure Symptom Monitoring and Self-Care Management Using the Mobile Application Rating Scale (MARS).      | JMIR MHealth and UHealth                |
| Zaidan S, Roehrer E                                                                                                 | Popular Mobile Phone Apps for Diet and Weight Loss: A Content Analysis.                                                                                                       | JMIR MHealth and UHealth                |
| Pereira-Azevedo N, Osorio L, Cavadas V, Fraga A, Carrasquinho E, Cardoso de Oliveira E, Castelo-Branco M, Roobol MJ | Expert Involvement Predicts mHealth App Downloads: Multivariate Regression Analysis of Urology Apps.                                                                          | JMIR MHealth and UHealth                |
| Rivera J, McPherson A, Hamilton J, Birken C, Coons M, Iyer S, Agarwal A, Laloo C, Stinson J                         | Mobile Apps for Weight Management: A Scoping Review.                                                                                                                          | JMIR MHealth and UHealth                |
| Franco RZ, Fallaize R, Lovegrove JA, Hwang F                                                                        | Popular Nutrition-Related Mobile Apps: A Feature Assessment.                                                                                                                  | JMIR MHealth and UHealth                |
| Wilson H, Stoyanov SR, Gandabhai S, Baldwin A                                                                       | The Quality and Accuracy of Mobile Apps to Prevent Driving After Drinking Alcohol.                                                                                            | JMIR MHealth and UHealth                |
| Geuens J, Swinnen TW, Westhovens R, de Vlam K, Geurts L, Vanden Abeele V                                            | A Review of Persuasive Principles in Mobile Apps for Chronic Arthritis Patients: Opportunities for Improvement.                                                               | JMIR MHealth and UHealth                |
| Huang ET, Williams H, Hocking JS, Lim MS                                                                            | Safe Sex Messages Within Dating and Entertainment Smartphone Apps: A Review.                                                                                                  | JMIR MHealth and UHealth                |

| Authors                                                                                                                                                  | Title                                                                                                                           | Journal                                         |
|----------------------------------------------------------------------------------------------------------------------------------------------------------|---------------------------------------------------------------------------------------------------------------------------------|-------------------------------------------------|
| Chen E, Mangone ER                                                                                                                                       | A Systematic Review of Apps using Mobile Criteria for Adolescent Pregnancy Prevention (mCAPP).                                  | JMIR MHealth and UHealth                        |
| Santo K, Richtering SS, Chalmers J, Thiagalingam A, Chow CK, Redfern J                                                                                   | Mobile Phone Apps to Improve Medication Adherence: A Systematic Stepwise Process to Identify High-Quality Apps.                 | JMIR MHealth and UHealth                        |
| Sullivan RK, Marsh S, Halvarsson J, Holdsworth M, Waterlander W, Poelman MP, Salmond JA, Christian H, Koh LS, Cade JE, Spence JC, Woodward A, Maddison R | Smartphone Apps for Measuring Human Health and Climate Change Co-Benefits: A Comparison and Quality Rating of Available Apps.   | JMIR MHealth and UHealth                        |
| Grainger R, Townsley H, White B, Langlotz T, Taylor WJ                                                                                                   | Apps for People With Rheumatoid Arthritis to Monitor Their Disease Activity: A Review of Apps for Best Practice and Quality.    | JMIR MHealth and UHealth                        |
| Christmann CA, Hoffmann A, Bleser G                                                                                                                      | Stress Management Apps With Regard to Emotion-Focused Coping and Behavior Change Techniques: A Content Analysis.                | JMIR MHealth and UHealth                        |
| Ginossar T, Shah SF, West AJ, Bentley JM, Caburnay CA, Kreuter MW, Kinney AY                                                                             | Content, Usability, and Utilization of Plain Language in Breast Cancer Mobile Phone Apps: A Systematic Analysis.                | JMIR MHealth and UHealth                        |
| Formagini TD, Ervilha RR, Machado NM, Andrade BA, Gomide HP, Ronzani TM                                                                                  | A review of smartphone apps for smoking cessation available in Portuguese.                                                      | Cadernos de Saude Publica                       |
| Bright T, Pallawela D                                                                                                                                    | Validated Smartphone-Based Apps for Ear and Hearing Assessments: A Review.                                                      | JMIR Rehabilitation And Assistive Technologies  |
| Cheng F, Xu J, Su C, Fu X, Bricker J                                                                                                                     | Content Analysis of Smartphone Apps for Smoking Cessation in China: Empirical Study.                                            | JMIR MHealth and UHealth                        |
| Tinschert P, Jakob R, Barata F, Kramer JN, Kowatsch T                                                                                                    | The Potential of Mobile Apps for Improving Asthma Self-Management: A Review of Publicly Available and Well-Adopted Asthma Apps. | JMIR MHealth and UHealth                        |
| Matava C, Leo AM, Alam F                                                                                                                                 | Mobile Apps for Teaching Intubation: Scoping Review and Critical Analysis in eLearning.                                         | JMIR medical education                          |
| Muthing J, Jaschke T, Friedrich CM                                                                                                                       | Client-Focused Security Assessment of mHealth Apps and Recommended Practices to Prevent or Mitigate Transport Security Issues.  | JMIR MHealth and UHealth                        |
| Laloo C, Shah U, Birnie KA, Davies-Chalmers C, Rivera J, Stinson J, Campbell F                                                                           | Commercially Available Smartphone Apps to Support Postoperative Pain Self-Management: Scoping Review.                           | JMIR MHealth and UHealth                        |
| Sudol NT, Adams-Piper E, Perry R, Lane F, Chen KT                                                                                                        | In Search of Mobile Applications for Patients With Pelvic Floor Disorders.                                                      | Female Pelvic Medicine & Reconstructive Surgery |

| Authors                                                                                      | Title                                                                                                                                                                        | Journal                                         |
|----------------------------------------------------------------------------------------------|------------------------------------------------------------------------------------------------------------------------------------------------------------------------------|-------------------------------------------------|
| Frie K, Hartmann-Boyce J, Jebb S, Albury C, Nourse R, Aveyard P                              | Insights From Google Play Store User Reviews for the Development of Weight Loss Apps: Mixed-Method Analysis.                                                                 | JMIR MHealth and UHealth                        |
| Wallace SL, Mehta S, Farag S, Kelley RS, Chen KT                                             | In Search of Mobile Applications for Urogynecology Providers.                                                                                                                | Female Pelvic Medicine & Reconstructive Surgery |
| Metelmann B, Metelmann C, Schuffert L, Hahnenkamp K, Brinkrolf P                             | Medical Correctness and User Friendliness of Available Apps for Cardiopulmonary Resuscitation: Systematic Search Combined With Guideline Adherence and Usability Evaluation. | JMIR MHealth and UHealth                        |
| Park JYE, Li J, Howren A, Tsao NW, De Vera M                                                 | Mobile Phone Apps Targeting Medication Adherence: Quality Assessment and Content Analysis of User Reviews.                                                                   | JMIR MHealth and UHealth                        |
| Devan H, Farmery D, Peebles L, Grainger R                                                    | Evaluation of Self-Management Support Functions in Apps for People With Persistent Pain: Systematic Review.                                                                  | JMIR MHealth and UHealth                        |
| Yang G, Long J, Luo D, Xiao S, Kaminga AC                                                    | The Characteristics and Quality of Mobile Phone Apps Targeted at Men Who Have Sex With Men in China: A Window of Opportunity for Health Information Dissemination?.          | JMIR MHealth and UHealth                        |
| Abroms L.C., Padmanabhan N., Thaweethai L., Phillips T.                                      | iPhone apps for smoking cessation: A content analysis.                                                                                                                       | American Journal of Preventive Medicine         |
| Cowan L.T., van Wagenen S.A., Brown B.A., Hedin R.J., Seino-Stephan Y., Hall P.C., West J.H. | Apps of Steel: Are Exercise Apps Providing Consumers With Realistic Expectations?: A Content Analysis of Exercise Apps for Presence of Behavior Change Theory.               | Health Education and Behavior                   |
| Muessig K.E., Pike E.C., Legrand S., Hightow-Weidman L.B.                                    | Mobile phone applications for the care and prevention of HIV and other sexually transmitted diseases: a review.                                                              | Journal of medical Internet research            |
| Azar K.M.J., Lesser L.I., Laing B.Y., Stephens J., Aurora M.S., Burke L.E., Palaniappan L.P. | Mobile applications for weight management: Theory-based content analysis.                                                                                                    | American Journal of Preventive Medicine         |
| Abroms L.C., Lee Westmaas J., Bontemps-Jones J., Ramani R., Mellerson J.                     | A content analysis of popular smartphone apps for smoking cessation.                                                                                                         | American Journal of Preventive Medicine         |
| Cantudo Cuenca M.R., Cantudo Cuenca M.D., Morillo Verdugo R.                                 | Availability and medical professional involvement in mobile healthcare applications related to pathophysiology and pharmacotherapy of HIV/AIDS.                              | European Journal of Hospital Pharmacy           |
| Haffey F., Brady R.R.W., Maxwell S.                                                          | Smartphone apps to support hospital prescribing and pharmacology education: A review of current provision.                                                                   | British Journal of Clinical Pharmacology        |
| Stevens D.J., Jackson J.A., Howes N., Morgan J.                                              | Obesity surgery smartphone apps: A review.                                                                                                                                   | Obesity Surgery                                 |

| <b>Authors</b>                                                                                                                             | <b>Title</b>                                                                                                                                                                  | <b>Journal</b>                                          |
|--------------------------------------------------------------------------------------------------------------------------------------------|-------------------------------------------------------------------------------------------------------------------------------------------------------------------------------|---------------------------------------------------------|
| Wallace L.S., Dhingra L.K.                                                                                                                 | A systematic review of smartphone applications for chronic pain available for download in the United States.                                                                  | Journal of Opioid Management                            |
| Cantudo-Cuenca Ma.R., Robustillo-Cortes Ma.A., Cantudo-Cuenca Ma.D., Morillo-Verdugo R.                                                    | A better regulation is required in viral hepatitis smartphone applications.                                                                                                   | Farmacia Hospitalaria                                   |
| Choi J., Noh G.Y., Park D.J.                                                                                                               | Smoking cessation apps for smartphones: content analysis with the self-determination theory.                                                                                  | Journal of medical Internet research                    |
| Arnhold M., Quade M., Kirch W.                                                                                                             | Mobile applications for diabetics: a systematic review and expert-based usability evaluation considering the special requirements of diabetes patients age 50 years or older. | Journal of medical Internet research                    |
| Huckvale K., Car M., Morrison C., Car J.                                                                                                   | Apps for asthma self-management: A systematic assessment of content and tools.                                                                                                | BMC Medicine                                            |
| Connor K., Brady R.R.W., De Beaux A., Tulloh B.                                                                                            | Contemporary hernia smartphone applications (apps).                                                                                                                           | Hernia                                                  |
| Bailey S.C., Belter L.T., Pandit A.U., Carpenter D.M., Carlos E., Wolf M.S.                                                                | The availability, functionality, and quality of mobile applications supporting medication selfmanagement.                                                                     | Journal of the American Medical Informatics Association |
| Mobasheri M.H., Johnston M., King D., Leff D., Thiruchelvam P., Darzi A.                                                                   | Smartphone breast applications - What's the evidence?.                                                                                                                        | Breast                                                  |
| Laloo C., Jibb L.A., Rivera J., Agarwal A., Stinson J.N.                                                                                   | there's a pain app for that: Review of patient-targeted smartphone applications for pain management.                                                                          | Clinical Journal of Pain                                |
| Stevens D.J., McKenzie K., Cui H.W., Noble J.G., Turney B.W.                                                                               | Smartphone apps for urolithiasis.                                                                                                                                             | Urolithiasis                                            |
| Wurzer P., Parvizi D., Lumenta D.B., Giretzlehner M., Branski L.K., Finnerty C.C., Herndon D.N., Tuca A., Rappl T., Smolle C., Kamolz L.P. | Smartphone applications in burns.                                                                                                                                             | Burns                                                   |
| van Mechelen D.M., van Mechelen W., Verhagen E.A.                                                                                          | Sports injury prevention in your pocket?! Prevention apps assessed against the available scientific evidence: a review.                                                       | British journal of sports medicine                      |
| Ouhbi S., Fernandez-Aleman J.L., Toval A., Idri A., Pozo J.R.                                                                              | Free Blood Donation Mobile Applications.                                                                                                                                      | Journal of Medical Systems                              |

| <b>Authors</b>                                                                                                               | <b>Title</b>                                                                                                            | <b>Journal</b>                                                                                    |
|------------------------------------------------------------------------------------------------------------------------------|-------------------------------------------------------------------------------------------------------------------------|---------------------------------------------------------------------------------------------------|
| Kumar N., Khunger M., Gupta A., Garg N.                                                                                      | A content analysis of smartphone-based applications for hypertension management.                                        | Journal of the American Society of Hypertension                                                   |
| Schnall R., Iribarren S.J.                                                                                                   | Review and analysis of existing mobile phone applications for health care-associated infection prevention.              | American Journal of Infection Control                                                             |
| Shelmerdine S.C., Lynch J.O.                                                                                                 | Smartphone applications in paediatric radiology: availability and authority.                                            | Pediatric Radiology                                                                               |
| Huckvale K., Morrison C., Ouyang J., Ghaghda A., Car J.                                                                      | The evolution of mobile apps for asthma: An updated systematic assessment of content and tools.                         | BMC Medicine                                                                                      |
| Wong M.C., Fung K.                                                                                                           | Mobile applications in otolaryngology-head and neck surgery.                                                            | Otolaryngology - Head and Neck Surgery (United States)                                            |
| Lupton D., Jutel A.                                                                                                          | 'It's like having a physician in your pocket!' A critical analysis of self-diagnosis smartphone apps.                   | Social Science and Medicine                                                                       |
| Jutel A., Lupton D.                                                                                                          | Digitizing diagnosis: A review of mobile applications in the diagnostic process.                                        | Diagnosis                                                                                         |
| Al Badi M.H., Chitme H.R.                                                                                                    | Smartphone applications for improved pharmaceutical care.                                                               | International Journal of Pharmaceutical Sciences and Research                                     |
| Kassianos A.P., Emery J.D., Murchie P., Walter F.M.                                                                          | Smartphone applications for melanoma detection by community, patient and generalist clinician users: A review.          | British Journal of Dermatology                                                                    |
| Kalz M., Lenssen N., Felzen M., Rossaint R., Tabuenca B., Specht M., Skorning M.                                             | Smartphone apps for cardiopulmonary resuscitation training and real incident support: a mixed-methods evaluation study. | Journal of medical Internet research                                                              |
| Huckvale K., Adomaviciute S., Prieto J.T., Leow M.K.-S., Car J.                                                              | Smartphone apps for calculating insulin dose: A systematic assessment.                                                  | BMC Medicine                                                                                      |
| Pereira-Azevedo N., Carrasquinho E., Cardoso De Oliveira E., Cavadas V., Osorio L., Fraga A., Castelo-Branco M., Roobol M.J. | mHealth in Urology: A review of experts' involvement in app development.                                                | PLoS ONE                                                                                          |
| Cheng N.M., Chakrabarti R., Kam J.K.                                                                                         | iPhone applications for eye care professionals: a review of current capabilities and concerns.                          | Telemedicine journal and e-health : the official journal of the American Telemedicine Association |

| <b>Authors</b>                                                                                                 | <b>Title</b>                                                                                                        | <b>Journal</b>                                                                                    |
|----------------------------------------------------------------------------------------------------------------|---------------------------------------------------------------------------------------------------------------------|---------------------------------------------------------------------------------------------------|
| Fijacko N., Brzan P.P., Stiglic G.                                                                             | Mobile Applications for Type 2 Diabetes Risk Estimation: a Systematic Review.                                       | Journal of Medical Systems                                                                        |
| Zhang M.W.B., Ho R.C.M., Hawa R., Sockalingam S.                                                               | Analysis of the Information Quality of Bariatric Surgery Smartphone Applications Using the Silberg Scale.           | Obesity Surgery                                                                                   |
| Morrissey E.C., Corbett T.K., Walsh J.C., Molloy G.J.                                                          | Behavior change techniques in apps for medication adherence: A content analysis.                                    | American Journal of Preventive Medicine                                                           |
| Thomas G.M., Lupton D.                                                                                         | Threats and thrills: pregnancy apps, risk and consumption.                                                          | Health, Risk and Society                                                                          |
| Kim M.S., Aro M.R., Lage K.J., Ingalls K.L., Sindhvani V., Markey M.K.                                         | Exploring the Usability of Mobile Apps Supporting Radiologists' Training in Diagnostic Decision Making.             | Journal of the American College of Radiology                                                      |
| Lee H., Sullivan S.J., Schneiders A.G., Ahmed O.H., Balasundaram A.P., Williams D., Meeuwisse W.H., McCrory P. | Smartphone and tablet apps for concussion road warriors (team clinicians): a systematic review for practical users. | British journal of sports medicine                                                                |
| Perry R., Lunde B., Chen K.T.                                                                                  | An evaluation of contraception mobile applications for providers of family planning services.                       | Contraception                                                                                     |
| Coulon S.M., Monroe C.M., West D.S.                                                                            | A systematic, multi-domain review of mobile smartphone apps for evidence-based stress management.                   | American Journal of Preventive Medicine                                                           |
| Darby A., Strum M.W., Holmes E., Gatwood J.                                                                    | A Review of Nutritional Tracking Mobile Applications for Diabetes Patient Use.                                      | Diabetes Technology and Therapeutics                                                              |
| Crane D., Garnett C., Brown J., West R., Michie S.                                                             | Behavior change techniques in popular alcohol reduction apps: content analysis.                                     | Journal of medical Internet research                                                              |
| Hoepfner B.B., Hoepfner S.S., Seaboyer L., Schick M.R., Wu G.W.Y., Bergman B.G., Kelly J.F.                    | How Smart are Smartphone Apps for Smoking Cessation? A Content Analysis.                                            | Nicotine and Tobacco Research                                                                     |
| Ong A.A., Gillespie M.B.                                                                                       | Overview of smartphone applications for sleep analysis.                                                             | World Journal of Otorhinolaryngology - Head and Neck Surgery                                      |
| Robustillo Cortes Md.eL., Cantudo Cuenca M.R., Morillo Verdugo R., Calvo Cidoncha E.                           | High quantity but limited quality in healthcare applications intended for HIV-infected patients.                    | Telemedicine journal and e-health : the official journal of the American Telemedicine Association |

| <b>Authors</b>                                                                                                                   | <b>Title</b>                                                                                                                                                               | <b>Journal</b>                                                                                                  |
|----------------------------------------------------------------------------------------------------------------------------------|----------------------------------------------------------------------------------------------------------------------------------------------------------------------------|-----------------------------------------------------------------------------------------------------------------|
| Nguyen A.D., Baysari M.T., Kannangara D.R.W., Tariq A., Lau A.Y.S., Westbrook J.I., Day R.O.                                     | Mobile applications to enhance self-management of gout.                                                                                                                    | International Journal of Medical Informatics                                                                    |
| Portelli P., Eldred C.                                                                                                           | A quality review of smartphone applications for the management of pain.                                                                                                    | British Journal of Pain                                                                                         |
| Brzan P.P., Rotman E., Pajnkihar M., Klanjek P.                                                                                  | Mobile Applications for Control and Self Management of Diabetes: A Systematic Review.                                                                                      | Journal of Medical Systems                                                                                      |
| Penzenstadler L., Chatton A., Van Singer M., Khazaal Y.                                                                          | Quality of Smartphone Apps Related to Alcohol Use Disorder.                                                                                                                | European Addiction Research                                                                                     |
| Gal N., Zite N.B., Wallace L.S.                                                                                                  | Evaluation of smartphone oral contraceptive reminder applications.                                                                                                         | Research in social & administrative pharmacy : RSAP                                                             |
| Gibbs J., Gkatzidou V., Tickle L., Manning S.R., Tilakkumar T., Hone K., Ashcroft R.E., Sonnenberg P., Sadiq S.T., Estcourt C.S. | 'Can you recommend any good STI apps?' A review of content, accuracy and comprehensiveness of current mobile medical applications for STIs and related genital infections. | Sexually Transmitted Infections                                                                                 |
| Lunde B., Perry R., Sridhar A., Chen K.T.                                                                                        | An Evaluation of Contraception Education and Health Promotion Applications for Patients.                                                                                   | Women's Health Issues                                                                                           |
| Calero J.J., Oton L.F., Oton C.A.                                                                                                | Apps for radiation oncology. A comprehensive review.                                                                                                                       | Translational Oncology                                                                                          |
| Collado-Borrell R., Escudero-Vilaplana V., Ribed-Sanchez A., Ibanez-Garcia S., Herranz-Alonso A., Sanjurjo-Saez M.               | Smartphone applications for cancer patients; what we know about them?.                                                                                                     | Farmacia hospitalaria : organo oficial de expresion cientifica de la Sociedad Espanola de Farmacia Hospitalaria |
| Radovic A., Vona P.L., Santostefano A.M., Ciaravino S., Miller E., Stein B.D.                                                    | Smartphone Applications for Mental Health.                                                                                                                                 | Cyberpsychology, behavior and social networking                                                                 |
| Nieto-Gutierrez W., Aguirre-Tipismana L., Torres-Mallma C., Salazar-Rojas R., Taype-Rondan A.                                    | Features of Zmobile provider education applications for prehospital trauma life support.                                                                                   | Journal of Emergency Medicine, Trauma and Acute Care                                                            |
| Nicholas J., Larsen M.E., Proudfoot J., Christensen H.                                                                           | Mobile Apps for Bipolar Disorder: A Systematic Review of Features and Content Quality.                                                                                     | Journal of medical Internet research                                                                            |



| Authors                                                                                                                                                 | Title                                                                                                                                                       | Journal                                                                                             |
|---------------------------------------------------------------------------------------------------------------------------------------------------------|-------------------------------------------------------------------------------------------------------------------------------------------------------------|-----------------------------------------------------------------------------------------------------|
| Sucala M., Cuijpers P., Muench F., Cardos R., Soflau R., Dobrean A., Achimas-Cadariu P., David D.                                                       | Anxiety: There is an app for that. A systematic review of anxiety apps.                                                                                     | Depression and Anxiety                                                                              |
| Schoeppe S., Alley S., Rebar A.L., Hayman M., Bray N.A., Van Lippevelde W., Gnam J.-P., Bachert P., Direito A., Vandelanotte C.                         | Apps to improve diet, physical activity and sedentary behaviour in children and adolescents: A review of quality, features and behaviour change techniques. | International Journal of Behavioral Nutrition and Physical Activity                                 |
| Tellez W.A., Nieto-Gutierrez W., Taype-Rondan A.                                                                                                        | Sunscreen mobile apps: A content analysis.                                                                                                                  | European Research in Telemedicine                                                                   |
| Hoepfner B.B., Schick M.R., Kelly L.M., Hoepfner S.S., Bergman B., Kelly J.F.                                                                           | There is an app for that - Or is there? A content analysis of publicly available smartphone apps for managing alcohol use.                                  | Journal of Substance Abuse Treatment                                                                |
| Meghani S.H., MacKenzie M.A., Morgan B., Kang Y., Wasim A., Sayani S.                                                                                   | Clinician-Targeted Mobile Apps in Palliative Care: A Systematic Review.                                                                                     | Journal of Palliative Medicine                                                                      |
| Edwards E.A., Lumsden J., Rivas C., Steed L., Edwards L.A., Thiyagarajan A., Sohanpal R., Caton H., Griffiths C.J., Munafo M.R., Taylor S., Walton R.T. | Gamification for health promotion: systematic review of behaviour change techniques in smartphone apps.                                                     | BMJ open                                                                                            |
| Shaia K.L., Farag S., Chyjek K., Knopman J., Chen K.T.                                                                                                  | An Evaluation of Mobile Applications for Reproductive Endocrinology and Infertility Providers.                                                              | Telemedicine journal and e-health : the official journal of the American Telemedicine Association   |
| Ye Q., Khan U., Boren S.A., Simoes E.J., Kim M.S.                                                                                                       | An Analysis of Diabetes Mobile Applications Features Compared to AADE7TM: Addressing Self-Management Behaviors in People With Diabetes.                     | Journal of Diabetes Science and Technology                                                          |
| Hoppe C.D., Cade J.E., Carter M.                                                                                                                        | An evaluation of diabetes targeted apps for Android smartphone in relation to behaviour change techniques.                                                  | Journal of human nutrition and dietetics : the official journal of the British Dietetic Association |
| Househ M., Hossain N., Jamal A., Zakaria N., Elmetwally A., Alsalamah M., Khalifa M.                                                                    | A cross-sectional content analysis of Android applications for asthma.                                                                                      | Health informatics journal                                                                          |
| Thornton L., Quinn C., Birrell L., Guillaumier A., Shaw B., Forbes E., Deady M., Kay-Lambkin F.                                                         | Free smoking cessation mobile apps available in Australia: a quality review and content analysis.                                                           | Australian and New Zealand journal of public health                                                 |

| Authors                                                                                                                    | Title                                                                                                                                                                  | Journal                                                                                                               |
|----------------------------------------------------------------------------------------------------------------------------|------------------------------------------------------------------------------------------------------------------------------------------------------------------------|-----------------------------------------------------------------------------------------------------------------------|
| Lambert K., Mullan J., Mansfield K., Owen P.                                                                               | Should We Recommend Renal Diet-Related Apps to Our Patients? An Evaluation of the Quality and Health Literacy Demand of Renal Diet-Related Mobile Applications.        | Journal of renal nutrition : the official journal of the Council on Renal Nutrition of the National Kidney Foundation |
| Leigh S., Ouyang J., Mimmagh C.                                                                                            | Effective? Engaging? Secure? Applying the ORCHA-24 framework to evaluate apps for chronic insomnia disorder.                                                           | Evidence-based mental health                                                                                          |
| Zhang M.W.B., Ho R.C.M., Loh A., Wing T., Wynne O., Chan S.W.C., Car J., Fung D.S.S.                                       | Current status of postnatal depression smartphone applications available on application stores: An information quality analysis.                                       | BMJ Open                                                                                                              |
| Zhou A.H., Patel V.R., Baredes S., Eloy J.A., Hsueh W.D.                                                                   | Mobile Applications for Allergic Rhinitis.                                                                                                                             | Annals of Otolaryngology and Laryngology                                                                              |
| Sharpe J.D., Kamara M.T.                                                                                                   | A systematic evaluation of mobile apps to improve the uptake of and adherence to HIV pre-exposure prophylaxis.                                                         | Sexual Health                                                                                                         |
| Casale M., Costantino A., Rinaldi V., Forte A., Grimaldi M., Sabatino L., Oliveto G., Aloise F., Pontari D., Salvinelli F. | Mobile applications in otolaryngology for patients: An update.                                                                                                         | Laryngoscope Investigative Otolaryngology                                                                             |
| Jovicic S., Siodmiak J., Watson I.D.                                                                                       | Quality evaluation of smartphone applications for laboratory medicine.                                                                                                 | Clinical Chemistry and Laboratory Medicine                                                                            |
| Fougereuse P.-A., Yasini M., Marchand G., Aalami O.O.                                                                      | A Cross-Sectional Study of Prominent US Mobile Health Applications: Evaluating the Current Landscape.                                                                  | AMIA ... Annual Symposium proceedings. AMIA Symposium                                                                 |
| Yu J.S., Kuhn E., Miller K.E., Taylor K.                                                                                   | Smartphone apps for insomnia: examining existing apps' usability and adherence to evidence-based principles for insomnia management.                                   | Translational behavioral medicine                                                                                     |
| Khander A., Farag S., Chen K.T.                                                                                            | Identification and Evaluation of Medical Translator Mobile Applications Using an Adapted APPLICATIONS Scoring System.                                                  | Telemedicine journal and e-health : the official journal of the American Telemedicine Association                     |
| Ben-Mussa A., Paget A.M.                                                                                                   | Popular apps on the medical category targeting patients and the general public in the United Kingdom: Do they conform to the Health On the Net Foundation principles?. | Health informatics journal                                                                                            |
| Wisniewski H., Liu G., Henson P., Vaidyam A., Hajratalli N.K., Onnela J.-P., Torous J.                                     | Understanding the quality, effectiveness and attributes of top-rated smartphone health apps.                                                                           | Evidence-based mental health                                                                                          |

| <b>Authors</b>                                                                                                  | <b>Title</b>                                                                                                                    | <b>Journal</b>                                                 |
|-----------------------------------------------------------------------------------------------------------------|---------------------------------------------------------------------------------------------------------------------------------|----------------------------------------------------------------|
| Brown H.M., Bucher T., Collins C.E., Rollo M.E.                                                                 | A review of pregnancy iPhone apps assessing their quality, inclusion of behaviour change techniques, and nutrition information. | Maternal and Child Nutrition                                   |
| Talwar D., Yeh Y.-L., Chen W.-J., Chen L.-S.                                                                    | Characteristics and quality of genetics and genomics mobile apps: a systematic review.                                          | European Journal of Human Genetics                             |
| Owens O.L., Beer J.M., Reyes L.I., Thomas T.L.                                                                  | Systematic Review of Commercially Available Mobile Phone Applications for Prostate Cancer Education.                            | American journal of men's health                               |
| Kwan V., Bihelek N., Anderson V., Yeates K.                                                                     | A Review of Smartphone Applications for Persons With Traumatic Brain Injury: What Is Available and What Is the Evidence?.       | The Journal of head trauma rehabilitation                      |
| Carmody J.K., Denson L.A., Hommel K.A.                                                                          | Content and Usability Evaluation of Medication Adherence Mobile Applications for Use in Pediatrics.                             | Journal of pediatric psychology                                |
| Grundy Q., Chiu K., Held F., Continella A., Bero L., Holz R.                                                    | Data sharing practices of medicines related apps and the mobile ecosystem: Traffic, content, and network analysis.              | BMJ (Online)                                                   |
| Singh K., Diamantidis C.J., Ramani S., Bhavsar N.A., Mara P., Warner J., Rodriguez J., Wang T., Wright-Nunes J. | Patients' and Nephrologists' Evaluation of Patient-Facing Smartphone Apps for CKD.                                              | Clinical journal of the American Society of Nephrology : CJASN |
| Luo D., Wang P., Lu F., Elias J., Sparks J.A., Lee Y.C.                                                         | Mobile Apps for Individuals with Rheumatoid Arthritis: A Systematic Review.                                                     | Journal of Clinical Rheumatology                               |
